# Supplementary material
Source: publisher figshare collection journal article supplement (https://tandf.figshare.com/articles/dataset/_/6293918)
Supplement: Supplementary file 1 [file 1]

Table 1

| Sample | Spot | <sup>207</sup> Pb <sup>a</sup><br>(cps) | U <sup>b</sup><br>(ppm) | Pb <sup>b</sup><br>(ppm) | Th <sup>b</sup><br>U | <sup>206</sup> Pb/ <sup>c</sup><br>(%) | <sup>206</sup> Pb/ <sup>d</sup><br><sup>238</sup> U<br>(%) | ±2σ | <sup>207</sup> Pb/ <sup>d</sup><br><sup>235</sup> U<br>(%) | ±2σ | <sup>207</sup> Pb/ <sup>d</sup><br><sup>206</sup> Pb<br>(%) | ±2σ  | rho <sup>e</sup> | <sup>206</sup> Pb/<br><sup>238</sup> U | ±2σ<br>(Ma) | <sup>207</sup> Pb/<br><sup>235</sup> U | ±2σ<br>(Ma) | <sup>207</sup> Pb/<br><sup>206</sup> Pb | ±2σ<br>(Ma) | conc.<br>(%) |
|--------|------|-----------------------------------------|-------------------------|--------------------------|----------------------|----------------------------------------|------------------------------------------------------------|-----|------------------------------------------------------------|-----|-------------------------------------------------------------|------|------------------|----------------------------------------|-------------|----------------------------------------|-------------|-----------------------------------------|-------------|--------------|
| 139    | A06  | 6733                                    | 667                     | 72                       | 0.88                 | 1.3                                    | 0.1086                                                     | 1.5 | 0.9329                                                     | 2.7 | 0.0623                                                      | 2.2  | 0.56             | 665                                    | 9           | 669                                    | 13          | 685                                     | 47          | 97           |
|        | A07  | 12595                                   | 598                     | 61                       | 1.04                 | 0.1                                    | 0.1029                                                     | 1.3 | 0.8643                                                     | 1.6 | 0.06093                                                     | 0.91 | 0.82             | 631                                    | 8           | 632                                    | 7           | 637                                     | 20          | 99           |
|        | A08  | 15940                                   | 757                     | 76                       | 1.08                 | 0.9                                    | 0.1012                                                     | 1.4 | 0.8452                                                     | 1.7 | 0.06061                                                     | 1    | 0.80             | 621                                    | 8           | 622                                    | 8           | 626                                     | 22          | 99           |
|        | A09  | 8802                                    | 493                     | 43                       | 0.93                 | 0.2                                    | 0.08897                                                    | 1.3 | 0.7197                                                     | 1.8 | 0.05869                                                     | 1.2  | 0.74             | 549                                    | 7           | 551                                    | 8           | 556                                     | 26          | 99           |
|        | A10  | 6151                                    | 348                     | 31                       | 0.68                 | 0.1                                    | 0.0911                                                     | 1.3 | 0.7412                                                     | 1.8 | 0.05902                                                     | 1.3  | 0.72             | 562                                    | 7           | 563                                    | 8           | 568                                     | 27          | 99           |
|        | A11  | 14089                                   | 724                     | 67                       | 0.74                 | 0.1                                    | 0.09336                                                    | 1.3 | 0.7634                                                     | 1.5 | 0.05933                                                     | 0.78 | 0.86             | 575                                    | 7           | 576                                    | 7           | 579                                     | 17          | 99           |
|        | A12  | 5503                                    | 277                     | 25                       | 0.82                 | 0.1                                    | 0.09295                                                    | 1.4 | 0.7596                                                     | 1.7 | 0.05929                                                     | 1    | 0.79             | 573                                    | 7           | 574                                    | 8           | 578                                     | 23          | 99           |
|        | A13  | 2498                                    | 265                     | 13                       | 0.60                 | 0.7                                    | 0.05127                                                    | 1.4 | 0.3739                                                     | 2.2 | 0.0529                                                      | 1.7  | 0.65             | 322                                    | 5           | 323                                    | 6           | 324                                     | 38          | 99           |
|        | A14  | 2823                                    | 239                     | 12                       | 0.47                 | 0.0                                    | 0.05084                                                    | 1.8 | 0.3726                                                     | 2.8 | 0.05317                                                     | 2.2  | 0.62             | 320                                    | 5           | 322                                    | 8           | 336                                     | 50          | 95           |
|        | A15  | 5712                                    | 308                     | 28                       | 0.78                 | 0.0                                    | 0.09294                                                    | 1.3 | 0.7586                                                     | 1.7 | 0.05921                                                     | 1.1  | 0.76             | 573                                    | 7           | 573                                    | 8           | 575                                     | 24          | 100          |
|        | A16  | 5228                                    | 559                     | 28                       | 0.52                 | 0.0                                    | 0.0516                                                     | 1.3 | 0.3769                                                     | 1.8 | 0.05299                                                     | 1.3  | 0.71             | 324                                    | 4           | 325                                    | 5           | 328                                     | 29          | 99           |
|        | A17  | 54746                                   | 1816                    | 168                      | 0.39                 | 3.5                                    | 0.09378                                                    | 1.4 | 0.7952                                                     | 3.1 | 0.06152                                                     | 2.8  | 0.44             | 578                                    | 8           | 594                                    | 14          | 657                                     | 60          | 88           |
|        | A18  | 35029                                   | 1992                    | 179                      | 0.53                 | 1.0                                    | 0.09117                                                    | 1.4 | 0.7415                                                     | 1.7 | 0.05901                                                     | 0.99 | 0.81             | 562                                    | 7           | 563                                    | 7           | 567                                     | 22          | 99           |
|        | A19  | 4569                                    | 563                     | 60                       | 0.71                 | 1.2                                    | 0.1073                                                     | 1.8 | 0.9182                                                     | 2.9 | 0.06206                                                     | 2.3  | 0.61             | 657                                    | 11          | 661                                    | 14          | 676                                     | 50          | 97           |
|        | A20  | 8093                                    | 284                     | 67                       | 0.74                 | 1.0                                    | 0.2337                                                     | 1.5 | 2.798                                                      | 2.0 | 0.08685                                                     | 1.3  | 0.76             | 1354                                   | 18          | 1355                                   | 15          | 1357                                    | 25          | 100          |
|        | A21  | 2634                                    | 321                     | 33                       | 0.59                 | 0.2                                    | 0.103                                                      | 1.6 | 0.8665                                                     | 2.6 | 0.06101                                                     | 2    | 0.63             | 632                                    | 10          | 634                                    | 12          | 639                                     | 43          | 99           |
|        | A22  | 15261                                   | 816                     | 71                       | 0.48                 | 0.6                                    | 0.0876                                                     | 1.3 | 0.7061                                                     | 1.7 | 0.05848                                                     | 1.1  | 0.77             | 541                                    | 7           | 542                                    | 7           | 548                                     | 23          | 99           |
|        | A23  | 23181                                   | 1073                    | 73                       | 0.25                 | 4.2                                    | 0.06914                                                    | 1.3 | 0.5488                                                     | 2.7 | 0.05758                                                     | 2.4  | 0.49             | 431                                    | 6           | 444                                    | 10          | 514                                     | 53          | 84           |
|        | A24  | 7121                                    | 397                     | 35                       | 0.75                 | 0.2                                    | 0.09014                                                    | 1.4 | 0.7303                                                     | 1.8 | 0.05878                                                     | 1.1  | 0.80             | 556                                    | 8           | 557                                    | 8           | 559                                     | 23          | 100          |
|        | A25  | 7373                                    | 357                     | 34                       | 0.61                 | 0.1                                    | 0.09565                                                    | 1.4 | 0.7869                                                     | 1.9 | 0.05969                                                     | 1.3  | 0.75             | 589                                    | 8           | 589                                    | 8           | 592                                     | 27          | 99           |
|        | A26  | 4995                                    | 499                     | 45                       | 0.96                 | 0.0                                    | 0.09191                                                    | 1.6 | 0.7481                                                     | 2.0 | 0.05905                                                     | 1.2  | 0.80             | 567                                    | 9           | 567                                    | 9           | 569                                     | 27          | 100          |
|        | A27  | 31780                                   | 226                     | 82                       | 1.05                 | 0.1                                    | 0.3496                                                     | 1.4 | 5.642                                                      | 1.6 | 0.1171                                                      | 0.69 | 0.90             | 1933                                   | 24          | 1923                                   | 14          | 1912                                    | 12          | 101          |
|        | A28  | 3144                                    | 328                     | 17                       | 0.60                 | 0.2                                    | 0.05259                                                    | 1.3 | 0.3854                                                     | 2.1 | 0.05316                                                     | 1.7  | 0.61             | 330                                    | 4           | 331                                    | 6           | 336                                     | 38          | 98           |
| 140    | A29  | 6455                                    | 879                     | 34                       | 1.28                 | 0.7                                    | 0.0398                                                     | 1.4 | 0.2818                                                     | 1.9 | 0.05137                                                     | 1.4  | 0.71             | 252                                    | 3           | 252                                    | 4           | 258                                     | 32          | 98           |
|        | A30  | 4305                                    | 233                     | 21                       | 0.68                 | 0.1                                    | 0.09293                                                    | 1.4 | 0.7581                                                     | 2.0 | 0.05918                                                     | 1.4  | 0.71             | 573                                    | 8           | 573                                    | 9           | 574                                     | 31          | 100          |
|        | A31  | 4268                                    | 621                     | 53                       | 0.34                 | 1.2                                    | 0.08694                                                    | 1.3 | 0.7005                                                     | 2.2 | 0.05845                                                     | 1.8  | 0.59             | 537                                    | 7           | 539                                    | 9           | 547                                     | 39          | 98           |
|        | A32  | 10791                                   | 1483                    | 61                       | 0.87                 | 0.6                                    | 0.04224                                                    | 1.3 | 0.3007                                                     | 1.7 | 0.05164                                                     | 1    | 0.80             | 267                                    | 3           | 267                                    | 4           | 270                                     | 23          | 99           |
| 107-b  | A38  | 6763                                    | 970                     | 39                       | 1.10                 | 0.4                                    | 0.04047                                                    | 1.4 | 0.2867                                                     | 1.7 | 0.0514                                                      | 1.1  | 0.78             | 256                                    | 3           | 256                                    | 4           | 259                                     | 25          | 99           |
|        | A39  | 5920                                    | 822                     | 33                       | 1.12                 | 0.3                                    | 0.04031                                                    | 1.3 | 0.2856                                                     | 1.8 | 0.05141                                                     | 1.3  | 0.71             | 255                                    | 3           | 255                                    | 4           | 259                                     | 30          | 98           |
|        | A40  | 7313                                    | 342                     | 34                       | 0.99                 | 0.6                                    | 0.09958                                                    | 1.3 | 0.8298                                                     | 2.0 | 0.06045                                                     | 1.5  | 0.67             | 612                                    | 8           | 613                                    | 9           | 620                                     | 31          | 99           |
|        | A417 | 11189                                   | 1257                    | 57                       | 1.12                 | 1.0                                    | 0.04633                                                    | 1.3 | 0.3354                                                     | 2.0 | 0.05252                                                     | 1.5  | 0.66             | 292                                    | 4           | 294                                    | 5           | 308                                     | 34          | 95           |
|        | A418 | 4594                                    | 1148                    | 54                       | 0.60                 | 0.7                                    | 0.04762                                                    | 1.4 | 0.3445                                                     | 2.1 | 0.05248                                                     | 1.6  | 0.67             | 300                                    | 4           | 301                                    | 6           | 307                                     | 36          | 98           |
|        | A419 | 3227                                    | 434                     | 33                       | 0.87                 | 0.5                                    | 0.0781                                                     | 1.4 | 0.6159                                                     | 2.6 | 0.05722                                                     | 2.2  | 0.55             | 485                                    | 7           | 487                                    | 10          | 500                                     | 48          | 97           |
|        | A420 | 11661                                   | 1037                    | 53                       | 0.72                 | 10.5                                   | 0.05127                                                    | 1.5 | 0.418                                                      | 4.0 | 0.05915                                                     | 3.7  | 0.37             | 322                                    | 5           | 355                                    | 12          | 573                                     | 81          | 56           |
|        | A421 | 26717                                   | 1576                    | 80                       | 0.97                 | 14.9                                   | 0.05127                                                    | 1.3 | 0.4407                                                     | 4.4 | 0.06236                                                     | 4.2  | 0.30             | 322                                    | 4           | 371                                    | 14          | 686                                     | 90          | 47           |
|        | A422 | 6045                                    | 388                     | 20                       | 1.18                 | 15.6                                   | 0.05152                                                    | 1.7 | 0.4431                                                     | 5.3 | 0.06238                                                     | 5    | 0.32             | 324                                    | 5           | 372                                    | 17          | 687                                     | 107         | 47           |
|        | A423 | 12719                                   | 678                     | 49                       | 0.30                 | 2.9                                    | 0.0726                                                     | 1.3 | 0.5748                                                     | 3.4 | 0.05744                                                     | 3.1  | 0.39             | 452                                    | 6           | 461                                    | 13          | 509                                     | 68          | 89           |
|        | A424 | 21836                                   | 347                     | 18                       | 1.17                 | 25.8                                   | 0.05247                                                    | 1.6 | 0.5174                                                     | 5.0 | 0.07154                                                     | 4.8  | 0.31             | 330                                    | 5           | 423                                    | 18          | 973                                     | 97          | 34           |
|        | A425 | 6837                                    | 484                     | 35                       | 0.38                 | 0.5                                    | 0.07412                                                    | 1.3 | 0.5768                                                     | 1.9 | 0.05646                                                     | 1.4  | 0.66             | 461                                    | 6           | 462                                    | 7           | 470                                     | 32          | 98           |
|        | A426 | 4887                                    | 566                     | 28                       | 1.13                 | 1.3                                    | 0.05079                                                    | 1.3 | 0.3698                                                     | 2.1 | 0.05281                                                     | 1.7  | 0.62             | 319                                    | 4           | 319                                    | 6           | 321                                     | 38          | 100          |
|        | A427 | 21956                                   | 3169                    | 118                      | 0.64                 | 0.6                                    | 0.03792                                                    | 1.3 | 0.2685                                                     | 1.6 | 0.05137                                                     | 1    | 0.80             | 240                                    | 3           | 241                                    | 4           | 257                                     | 23          | 93           |
|        | A428 | 9286                                    | 852                     | 40                       | 0.68                 | 2.7                                    | 0.04794                                                    | 1.3 | 0.3542                                                     | 2.9 | 0.0536                                                      | 2.6  | 0.44             | 302                                    | 4           | 308                                    | 8           | 354                                     | 58          | 85           |
|        | A429 | 3376                                    | 651                     | 29                       | 2.19                 | 1.1                                    | 0.04598                                                    | 1.5 | 0.335                                                      | 3.5 | 0.05287                                                     | 3.2  | 0.42             | 290                                    | 4           | 293                                    | 9           | 323                                     | 73          | 90           |
|        | A431 | 11491                                   | 2085                    | 54                       | 1.50                 | 0.6                                    | 0.02627                                                    | 1.8 | 0.1802                                                     | 2.3 | 0.04974                                                     | 1.4  | 0.80             | 167                                    | 3           | 168                                    | 4           | 183                                     | 32          | 91           |
|        | A432 | 52876                                   | 2803                    | 62                       | 0.99                 | 14.9                                   | 0.0223                                                     | 1.7 | 0.1763                                                     | 4.6 | 0.05735                                                     | 4.3  | 0.38             | 142                                    | 2           | 165                                    | 7           | 505                                     | 94          | 28           |
|        | A433 | 158800                                  | 1065                    | 308                      | 0.16                 | 7.1                                    | 0.2815                                                     | 1.3 | 4.132                                                      | 2.4 | 0.1065                                                      | 2    | 0.57             | 1599                                   | 19          | 1661                                   | 20          | 1740                                    | 36          | 92           |
|        | A434 | 29077                                   | 766                     | 124                      | 1.30                 | 0.4                                    | 0.1622                                                     | 1.3 | 1.604                                                      | 1.6 | 0.07172                                                     | 0.86 | 0.83             | 969                                    | 12          | 972                                    | 10          | 978                                     | 18          | 99           |
|        | A435 | 6045                                    | 1308                    | 65                       | 0.80                 | 1.5                                    | 0.05029                                                    | 1.3 | 0.3717                                                     | 2.9 | 0.05361                                                     | 2.6  | 0.46             | 316                                    | 4           | 321                                    | 8           | 355                                     | 59          | 89           |
|        | A436 | 18363                                   | 558                     | 79                       | 0.23                 | 0.1                                    | 0.1427                                                     | 1.2 | 1.337                                                      | 1.5 | 0.06798                                                     | 0.84 | 0.83             | 860                                    | 10          | 862                                    | 9           | 868                                     | 17          | 99           |
|        | A437 | 22241                                   | 1723                    | 122                      | 0.06                 | 0.1                                    | 0.07194                                                    | 1.3 | 0.5556                                                     | 1.4 | 0.05603                                                     | 0.72 | 0.87             | 448                                    | 5           | 449                                    | 5           | 454                                     | 16          | 99           |
|        | A438 | 9228                                    | 1030                    | 52                       | 0.86                 | 0.2                                    | 0.05131                                                    | 1.3 | 0.3752                                                     | 1.7 | 0.05305                                                     | 1.1  | 0.77             | 323                                    | 4           | 323                                    | 5           | 331                                     | 24          | 98           |
|        | A444 | 5576                                    | 1381                    | 65                       | 0.57                 | 0.3                                    | 0.04817                                                    | 1.3 | 0.3495                                                     | 2.1 | 0.05264                                                     | 1.7  | 0.62             | 303                                    | 4           | 304                                    | 6           | 313                                     | 38          | 97           |
|        | A445 | 54396                                   | 603                     | 231                      | 0.80                 | 7.7                                    | 0.3649                                                     | 1.6 | 6.704                                                      | 2.4 | 0.1333                                                      | 1.9  | 0.64             | 2005                                   | 27          | 2073                                   | 22          | 2142                                    | 33          | 94           |
|        | A446 | 3311                                    | 1277                    | 49                       | 1.36                 | 4.6                                    | 0.03928                                                    | 2.1 | 0.2906                                                     | 3.9 | 0.05368                                                     | 3.2  | 0.55             | 248                                    | 5           | 259                                    | 9           | 358                                     | 73          | 69           |
|        | A447 | 8012                                    | 993                     | 49                       | 1.03                 | 6.5                                    | 0.04984                                                    | 1.4 | 0.3875                                                     | 3.3 | 0.05642                                                     | 3    | 0.42             | 314                                    | 4           | 333                                    | 9           | 469                                     | 67          | 67           |
|        | A448 | 1339                                    | 290                     | 14                       | 0.83                 | 1.5                                    | 0.04805                                                    | 1.5 | 0.3528                                                     | 3.3 | 0.05326                                                     | 3    | 0.46             | 303                                    | 5           | 307                                    | 9           | 340                                     | 67          | 89           |
|        | A449 | 21556                                   | 765                     | 33                       | 1.03                 | 12.3                                   | 0.04357                                                    | 1.4 | 0.3572                                                     | 4.3 | 0.05948                                                     | 4.1  | 0.33             | 275                                    | 4           | 310                                    | 12          | 585                                     | 88          | 47           |
|        | A450 | 28647                                   | 3774                    | 85                       | 1.22                 | 4.0                                    | 0.02297                                                    | 1.6 | 0.1617                                                     | 3.7 | 0.05107                                                     | 3.3  | 0.44             | 146                                    | 2           | 152                                    | 5           | 244                                     | 77          | 60           |
|        | A451 | 35347                                   | 3243                    | 188                      | 0.89                 | 1.0                                    | 0.059                                                      | 1.6 | 0.4423                                                     | 2.0 | 0.05439                                                     | 1.2  | 0.79             | 370                                    | 6           | 372                                    | 6           | 387                                     | 27          | 95           |
|        | A452 | 3892                                    | 591                     | 30                       | 1.22                 | 5.8                                    | 0.05147                                                    | 1.6 | 0.3967                                                     | 3.6 | 0.05592                                                     | 3.2  | 0.45             | 324                                    | 5           | 339                                    | 10          | 449                                     | 71          | 72           |
|        | A453 | 10893                                   | 2281                    | 113                      | 0.64                 | 0.8                                    | 0.05042                                                    | 1.4 | 0.3695                                                     | 1.8 | 0.05317                                                     | 1.2  | 0.77             | 317                                    | 4           | 319                                    | 5           | 336                                     | 27          | 94           |
|        | A454 | 3399                                    | 625                     | 30                       | 0.93                 | 6.6                                    | 0.04809                                                    | 1.8 | 0.3725                                                     | 3.6 | 0.05619                                                     | 3.1  | 0.51             | 303                                    | 5           | 321                                    | 10          | 460                                     | 68          | 66           |
|        | A455 | 7555                                    | 905                     | 78                       | 1.16                 | 0.2                                    | 0.0874                                                     | 1.4 | 0.7049                                                     | 1.8 | 0.05852                                                     | 1.1  | 0.78             | 540                                    | 7           | 542                                    | 7           | 549                                     | 24          | 98           |
|        | A456 | 4081                                    | 692                     | 44                       | 0.26                 | 1.4                                    | 0.06492                                                    | 1.7 | 0.4982                                                     | 2.7 | 0.05567                                                     | 2.1  | 0.62             | 405                                    | 7           | 410                                    | 9           | 439                                     | 47          | 92           |
|        | A457 | 21178                                   | 2561                    | 225                      | 0.11                 | 0.7                                    | 0.08901                                                    | 1.4 | 0.7218                                                     | 1.7 | 0.05884                                                     | 0.96 | 0.82             | 550                                    | 7           | 552                                    | 7           | 561                                     | 21          | 98           |
|        | A458 | 4478                                    | 878                     | 50                       | 0.31                 | 1.0                                    | 0.05805                                                    | 1.7 | 0.4329                                                     | 2.6 | 0.0541                                                      | 1.9  | 0.67             | 364                                    | 6           | 365                                    | 8           | 375                                     | 42          | 97           |

|      |        |      |     |      |      |         |     |        |     |         |      |      |      |    |      |    |      |     |     |
|------|--------|------|-----|------|------|---------|-----|--------|-----|---------|------|------|------|----|------|----|------|-----|-----|
| A487 | 15746  | 599  | 28  | 1,37 | 9,3  | 0,04762 | 1,4 | 0,3817 | 3,8 | 0,05815 | 3,5  | 0,38 | 300  | 4  | 328  | 11 | 535  | 77  | 56  |
| A488 | 28884  | 1701 | 82  | 0,90 | 5,5  | 0,04886 | 1,3 | 0,3746 | 3,8 | 0,05562 | 3,5  | 0,35 | 308  | 4  | 323  | 10 | 437  | 78  | 70  |
| A489 | 25105  | 1273 | 87  | 1,31 | 25,1 | 0,06831 | 2,7 | 0,6862 | 6,1 | 0,07287 | 5,4  | 0,44 | 426  | 11 | 530  | 25 | 1010 | 110 | 42  |
| A490 | 37174  | 2571 | 125 | 0,81 | 5,2  | 0,04948 | 1,4 | 0,3776 | 3,2 | 0,05537 | 2,8  | 0,44 | 311  | 4  | 325  | 9  | 427  | 63  | 73  |
| A491 | 12257  | 2360 | 183 | 0,52 | 1,4  | 0,07841 | 1,4 | 0,6207 | 1,9 | 0,05742 | 1,4  | 0,70 | 487  | 6  | 490  | 8  | 508  | 31  | 96  |
| A492 | 7264   | 1343 | 61  | 0,59 | 3,3  | 0,04622 | 1,5 | 0,3439 | 2,8 | 0,05397 | 2,4  | 0,53 | 291  | 4  | 300  | 7  | 370  | 53  | 79  |
| A493 | 8888   | 444  | 45  | 1,00 | 1,3  | 0,1015  | 1,3 | 0,8491 | 1,9 | 0,06072 | 1,4  | 0,67 | 623  | 8  | 624  | 9  | 629  | 31  | 99  |
| A499 | 20828  | 1201 | 58  | 1,18 | 7,4  | 0,04935 | 1,8 | 0,3862 | 3,7 | 0,05677 | 3,2  | 0,50 | 311  | 6  | 332  | 10 | 483  | 70  | 64  |
| A500 | 27496  | 1496 | 87  | 0,35 | 14,6 | 0,05836 | 1,7 | 0,5143 | 4,3 | 0,06393 | 4    | 0,39 | 366  | 6  | 421  | 15 | 739  | 84  | 49  |
| A501 | 6043   | 1529 | 74  | 2,57 | 0,3  | 0,04932 | 1,4 | 0,3588 | 2,3 | 0,05278 | 1,8  | 0,59 | 310  | 4  | 311  | 6  | 319  | 42  | 97  |
| A502 | 24887  | 1947 | 103 | 1,11 | 14,6 | 0,05322 | 1,9 | 0,4483 | 5,3 | 0,06111 | 5    | 0,35 | 334  | 6  | 376  | 17 | 643  | 107 | 52  |
| A503 | 23530  | 1613 | 125 | 0,59 | 1,6  | 0,0786  | 1,3 | 0,6273 | 2,1 | 0,0579  | 1,6  | 0,65 | 488  | 6  | 494  | 8  | 526  | 35  | 93  |
| A504 | 36789  | 700  | 46  | 0,87 | 18,0 | 0,0665  | 1,5 | 0,6164 | 4,4 | 0,06725 | 4,1  | 0,35 | 415  | 6  | 488  | 17 | 846  | 85  | 49  |
| A505 | 26661  | 2551 | 118 | 1,14 | 2,0  | 0,04729 | 1,4 | 0,3418 | 5,9 | 0,05244 | 5,7  | 0,23 | 298  | 4  | 299  | 15 | 305  | 130 | 98  |
| A506 | 115686 | 760  | 266 | 0,63 | 4,3  | 0,3365  | 1,3 | 5,545  | 2,3 | 0,1196  | 1,9  | 0,58 | 1870 | 22 | 1908 | 20 | 1950 | 33  | 96  |
| A507 | 7039   | 809  | 38  | 0,38 | 1,1  | 0,04808 | 1,4 | 0,3496 | 2,3 | 0,05276 | 1,8  | 0,62 | 303  | 4  | 304  | 6  | 318  | 41  | 95  |
| A508 | 29540  | 1764 | 83  | 0,55 | 4,0  | 0,04799 | 1,4 | 0,3611 | 2,7 | 0,0546  | 2,3  | 0,52 | 302  | 4  | 313  | 7  | 396  | 51  | 76  |
| A509 | 36915  | 4688 | 127 | 0,57 | 13,7 | 0,02753 | 1,8 | 0,2151 | 4,8 | 0,05669 | 4,4  | 0,39 | 175  | 3  | 198  | 9  | 479  | 97  | 37  |
| A510 | 17387  | 755  | 194 | 0,23 | 0,7  | 0,2531  | 1,7 | 3,213  | 2,0 | 0,09209 | 1,1  | 0,84 | 1454 | 22 | 1460 | 16 | 1469 | 20  | 99  |
| A511 | 6285   | 1085 | 54  | 0,81 | 2,9  | 0,0502  | 1,4 | 0,376  | 3,5 | 0,05434 | 3,2  | 0,42 | 316  | 4  | 324  | 10 | 385  | 71  | 82  |
| A512 | 9789   | 267  | 17  | 1,08 | 30,2 | 0,06167 | 2,1 | 0,6625 | 5,1 | 0,07794 | 4,7  | 0,41 | 386  | 8  | 516  | 21 | 1145 | 93  | 34  |
| A513 | 68770  | 1082 | 56  | 0,82 | 27,6 | 0,052   | 1,4 | 0,5202 | 5,4 | 0,07256 | 5,2  | 0,27 | 327  | 5  | 425  | 19 | 1002 | 106 | 33  |
| A514 | 10091  | 759  | 54  | 0,21 | 0,9  | 0,0725  | 1,3 | 0,565  | 2,0 | 0,05653 | 1,6  | 0,62 | 451  | 5  | 455  | 7  | 473  | 35  | 95  |
| A515 | 9577   | 142  | 59  | 1,05 | 0,6  | 0,3961  | 1,4 | 7,202  | 1,8 | 0,1319  | 1    | 0,81 | 2151 | 26 | 2137 | 16 | 2123 | 18  | 101 |
| A516 | 54758  | 402  | 33  | 0,16 | 33,8 | 0,08094 | 1,9 | 0,9602 | 5,1 | 0,08607 | 4,8  | 0,37 | 502  | 9  | 683  | 26 | 1340 | 92  | 37  |
| A517 | 8775   | 1083 | 50  | 1,07 | 0,7  | 0,0466  | 1,4 | 0,3381 | 2,1 | 0,05264 | 1,6  | 0,66 | 294  | 4  | 296  | 5  | 313  | 35  | 94  |
| A518 | 27288  | 213  | 14  | 1,04 | 41,2 | 0,06246 | 2,2 | 0,8021 | 6,6 | 0,09318 | 6,2  | 0,33 | 391  | 8  | 598  | 30 | 1491 | 118 | 26  |
| A519 | 11202  | 1333 | 82  | 0,33 | 8,5  | 0,06248 | 1,5 | 0,5125 | 3,6 | 0,05951 | 3,2  | 0,42 | 391  | 6  | 420  | 12 | 586  | 70  | 67  |
| A520 | 18823  | 946  | 101 | 0,64 | 0,2  | 0,1077  | 1,3 | 0,9158 | 1,5 | 0,0617  | 0,81 | 0,85 | 659  | 8  | 660  | 7  | 664  | 17  | 99  |
| A521 | 4670   | 725  | 67  | 0,35 | 2,4  | 0,09397 | 1,5 | 0,7802 | 4,0 | 0,06023 | 3,7  | 0,38 | 579  | 9  | 586  | 18 | 612  | 80  | 95  |
| A522 | 24869  | 1187 | 69  | 1,06 | 17,7 | 0,05832 | 2,1 | 0,5302 | 4,9 | 0,06595 | 4,4  | 0,42 | 365  | 7  | 432  | 17 | 805  | 92  | 45  |
| A523 | 7424   | 553  | 42  | 0,64 | 0,8  | 0,07721 | 1,4 | 0,6052 | 2,0 | 0,05687 | 1,4  | 0,69 | 479  | 6  | 481  | 8  | 486  | 32  | 99  |
| A524 | 15538  | 918  | 87  | 0,60 | 0,1  | 0,09629 | 1,3 | 0,7939 | 1,5 | 0,05982 | 0,8  | 0,85 | 593  | 7  | 593  | 7  | 597  | 17  | 99  |
| A525 | 6345   | 1558 | 73  | 0,49 | 1,3  | 0,04774 | 1,4 | 0,3499 | 4,3 | 0,05316 | 4,1  | 0,33 | 301  | 4  | 305  | 12 | 336  | 93  | 90  |
| A526 | 21295  | 664  | 32  | 0,56 | 14,3 | 0,04891 | 1,4 | 0,4154 | 4,8 | 0,06161 | 4,6  | 0,29 | 308  | 4  | 353  | 14 | 661  | 98  | 47  |
| A527 | 2054   | 238  | 12  | 0,57 | 0,0  | 0,05028 | 1,4 | 0,3658 | 2,1 | 0,05278 | 1,6  | 0,66 | 316  | 4  | 317  | 6  | 319  | 36  | 99  |
| A528 | 8214   | 996  | 47  | 1,04 | 0,8  | 0,0482  | 1,3 | 0,3499 | 1,8 | 0,05266 | 1,2  | 0,74 | 303  | 4  | 305  | 5  | 314  | 27  | 97  |
| A529 | 17222  | 1683 | 157 | 0,40 | 4,1  | 0,09415 | 1,7 | 0,7863 | 3,4 | 0,06059 | 3    | 0,49 | 580  | 9  | 589  | 15 | 625  | 64  | 93  |
| A530 | 3065   | 873  | 51  | 0,26 | 0,5  | 0,05906 | 1,5 | 0,442  | 2,3 | 0,05429 | 1,7  | 0,65 | 370  | 5  | 372  | 7  | 383  | 39  | 97  |
| A531 | 2005   | 335  | 27  | 0,62 | 0,7  | 0,08188 | 1,4 | 0,6498 | 2,9 | 0,05758 | 2,5  | 0,48 | 507  | 7  | 508  | 12 | 514  | 55  | 99  |
| A532 | 5728   | 1023 | 41  | 1,15 | 5,4  | 0,04124 | 1,6 | 0,309  | 3,3 | 0,05437 | 2,8  | 0,49 | 260  | 4  | 273  | 8  | 386  | 64  | 67  |
| A533 | 5673   | 728  | 63  | 1,19 | 0,0  | 0,08794 | 1,3 | 0,7082 | 1,8 | 0,05843 | 1,2  | 0,76 | 543  | 7  | 544  | 7  | 546  | 25  | 100 |
| A534 | 3026   | 800  | 41  | 0,70 | 0,5  | 0,05156 | 1,3 | 0,3766 | 2,4 | 0,05299 | 2    | 0,54 | 324  | 4  | 325  | 7  | 328  | 46  | 99  |
| A535 | 115750 | 2957 | 212 | 0,30 | 15,0 | 0,07224 | 1,6 | 0,6542 | 4,6 | 0,0657  | 4,3  | 0,34 | 450  | 7  | 511  | 19 | 797  | 90  | 56  |
| A536 | 33531  | 412  | 81  | 0,47 | 4,5  | 0,1957  | 1,5 | 2,213  | 2,4 | 0,08202 | 1,8  | 0,65 | 1152 | 16 | 1185 | 17 | 1246 | 36  | 92  |
| A537 | 5417   | 617  | 26  | 0,82 | 0,8  | 0,04282 | 1,3 | 0,3077 | 2,3 | 0,05214 | 1,8  | 0,58 | 270  | 3  | 272  | 5  | 292  | 42  | 93  |
| A538 | 25956  | 1682 | 236 | 0,03 | 0,9  | 0,1408  | 1,4 | 1,315  | 1,7 | 0,06777 | 0,92 | 0,83 | 849  | 11 | 852  | 10 | 862  | 19  | 99  |
| A539 | 4946   | 1289 | 63  | 1,04 | 0,0  | 0,04961 | 1,3 | 0,3602 | 1,7 | 0,05267 | 0,99 | 0,80 | 312  | 4  | 312  | 4  | 315  | 23  | 99  |
| A540 | 13867  | 609  | 55  | 0,14 | 2,1  | 0,09153 | 1,3 | 0,7606 | 3,0 | 0,06028 | 2,7  | 0,43 | 565  | 7  | 574  | 13 | 614  | 58  | 92  |
| A541 | 16681  | 501  | 23  | 0,74 | 16,9 | 0,04724 | 1,6 | 0,4121 | 4,6 | 0,06328 | 4,3  | 0,34 | 298  | 5  | 350  | 14 | 718  | 92  | 41  |
| A542 | 20928  | 2663 | 124 | 0,99 | 0,3  | 0,04737 | 1,3 | 0,3429 | 1,7 | 0,05252 | 1,1  | 0,76 | 298  | 4  | 299  | 4  | 308  | 24  | 97  |
| A543 | 5917   | 728  | 35  | 1,37 | 0,3  | 0,04832 | 1,3 | 0,3505 | 2,0 | 0,05262 | 1,4  | 0,68 | 304  | 4  | 305  | 5  | 312  | 33  | 97  |
| A544 | 7735   | 752  | 42  | 0,08 | 0,8  | 0,05612 | 1,3 | 0,4177 | 1,8 | 0,054   | 1,2  | 0,74 | 352  | 5  | 354  | 5  | 371  | 27  | 95  |
| A545 | 5888   | 451  | 32  | 0,82 | 0,9  | 0,07289 | 1,4 | 0,568  | 2,3 | 0,05653 | 1,9  | 0,58 | 454  | 6  | 457  | 9  | 473  | 42  | 96  |
| A546 | 10849  | 1196 | 57  | 0,88 | 1,0  | 0,0485  | 1,3 | 0,3545 | 2,2 | 0,05302 | 1,7  | 0,60 | 305  | 4  | 308  | 6  | 330  | 40  | 93  |
| A547 | 3570   | 972  | 44  | 1,25 | 0,3  | 0,04569 | 1,4 | 0,3288 | 2,2 | 0,05222 | 1,7  | 0,64 | 288  | 4  | 289  | 5  | 295  | 38  | 98  |
| A548 | 17704  | 2190 | 93  | 3,74 | 0,6  | 0,04346 | 1,3 | 0,312  | 1,7 | 0,05209 | 1    | 0,79 | 274  | 4  | 276  | 4  | 289  | 23  | 95  |
| A554 | 13723  | 1014 | 110 | 0,16 | 8,9  | 0,109   | 1,3 | 0,9884 | 3,3 | 0,06578 | 3    | 0,40 | 667  | 8  | 698  | 17 | 799  | 63  | 83  |
| A555 | 9786   | 972  | 46  | 0,87 | 1,5  | 0,04778 | 1,3 | 0,3492 | 3,1 | 0,05302 | 2,8  | 0,41 | 301  | 4  | 304  | 8  | 330  | 64  | 91  |
| A556 | 25744  | 653  | 65  | 1,04 | 19,8 | 0,09928 | 5,4 | 1,027  | 7,0 | 0,07501 | 4,4  | 0,77 | 610  | 31 | 717  | 36 | 1069 | 89  | 57  |
| A557 | 4520   | 631  | 38  | 0,77 | 4,4  | 0,06193 | 1,8 | 0,4817 | 3,9 | 0,05643 | 3,4  | 0,46 | 387  | 7  | 399  | 13 | 469  | 76  | 83  |
| A558 | 2547   | 731  | 35  | 0,38 | 2,3  | 0,04838 | 1,5 | 0,3581 | 2,4 | 0,0537  | 1,9  | 0,62 | 305  | 4  | 311  | 6  | 358  | 43  | 85  |
| A559 | 12263  | 1436 | 71  | 0,50 | 0,0  | 0,04998 | 1,3 | 0,3653 | 2,3 | 0,05301 | 1,9  | 0,57 | 314  | 4  | 316  | 6  | 329  | 44  | 95  |
| A560 | 8805   | 1016 | 44  | 1,51 | 1,6  | 0,04431 | 1,3 | 0,3196 | 2,7 | 0,05232 | 2,3  | 0,49 | 280  | 4  | 282  | 7  | 299  | 54  | 93  |
| A561 | 13689  | 1495 | 62  | 1,26 | 2,0  | 0,04228 | 1,3 | 0,3071 | 2,1 | 0,0527  | 1,7  | 0,59 | 267  | 3  | 272  | 5  | 316  | 39  | 85  |
| A562 | 21213  | 1711 | 167 | 0,08 | 10,5 | 0,09836 | 1,5 | 0,9168 | 3,8 | 0,06763 | 3,5  | 0,40 | 605  | 9  | 661  | 19 | 857  | 72  | 71  |
| A563 | 6988   | 412  | 40  | 0,75 | 0,4  | 0,09711 | 1,3 | 0,8019 | 1,8 | 0,0599  | 1,2  | 0,72 | 597  | 7  | 598  | 8  | 600  | 26  | 100 |
| A564 | 2883   | 114  | 14  | 1,13 | 11,1 | 0,1187  | 2,5 | 1,162  | 4,3 | 0,07103 | 3,5  | 0,59 | 723  | 17 | 783  | 24 | 958  | 71  | 75  |

Spot size = 23 and 33  $\mu\text{m}$ , respectively; depth of crater ~15 $\mu\text{m}$ .  $^{206}\text{Pb}/^{238}\text{U}$  error is the quadratic additions of the within run precision (2 SE) and the external reproducibility (2 SD) of the reference zircon.

$^{207}\text{Pb}/^{206}\text{Pb}$  error propagation ( $^{207}\text{Pb}$  signal dependent) following Gerdes & Zeh (2009).  $^{207}\text{Pb}/^{235}\text{U}$  error is the quadratic addition of the  $^{207}\text{Pb}/^{206}\text{Pb}$  and  $^{206}\text{Pb}/^{235}\text{U}$  uncertainty.

<sup>a</sup> Within run background-corrected mean  $^{207}\text{Pb}$  signal in cps (counts per second).

<sup>b</sup> U and Pb content and Th/U ratio were calculated relative to GJ-1 reference zircon.

<sup>c</sup> percentage of the common Pb on the  $^{206}\text{Pb}$ . b.d. = below detection limit.

<sup>d</</sup>
