# Supplementary material
Source: publisher figshare collection journal article supplement (https://tandf.figshare.com/articles/dataset/_/6293918)
Supplement: Supplementary file 2 [file 1]

**Table 2** LA-MC-ICPMS Lu-Hf isotope data

| Sample | Spot | $^{176}\text{Yb}/^{177}\text{Hf}$ | $\pm 2\sigma$ | $^{176}\text{Lu}/^{177}\text{Hf}$ | $\pm 2\sigma$ | $^{176}\text{Hf}/^{177}\text{Hf}$ | $\pm 2\sigma$ | $^{176}\text{Hf}/^{177}\text{Hf}$ | $\pm 2\sigma$ | $^{176}\text{Hf}/^{177}\text{Hf}$ | $\pm 2\sigma$ | $\delta\text{Hf}(t)$ | $\pm 2\sigma$ | $T_{\text{DM}}$ | age  | $\pm 2\sigma$ |
|--------|------|-----------------------------------|---------------|-----------------------------------|---------------|-----------------------------------|---------------|-----------------------------------|---------------|-----------------------------------|---------------|----------------------|---------------|-----------------|------|---------------|
|        |      |                                   |               |                                   |               | $\text{Si}_{\text{Hf}}$           |               |                                   |               |                                   |               | (V)                  |               | (Ga)            | (Ma) |               |
| 139    | A07  | 0.0407                            | 34            | 0.00146                           | 9             | 1.46718                           | 1.88664       | 8                                 | 0.282612      | 58                                | 0.282595      | 7.4                  | 2.1           | 1.00            | 631  | 8             |
|        | A08  | 0.0189                            | 16            | 0.00074                           | 5             | 1.46724                           | 1.88640       | 8                                 | 0.282626      | 50                                | 0.282617      | 7.9                  | 1.8           | 0.97            | 621  | 8             |
|        | A10  | 0.0350                            | 30            | 0.00131                           | 9             | 1.46726                           | 1.88641       | 7                                 | 0.282582      | 42                                | 0.282568      | 4.9                  | 1.5           | 1.09            | 562  | 7             |
|        | A11  | 0.0514                            | 42            | 0.00171                           | 11            | 1.46720                           | 1.88653       | 11                                | 0.282574      | 36                                | 0.282556      | 4.7                  | 1.3           | 1.10            | 575  | 7             |
|        | A12  | 0.0409                            | 33            | 0.00134                           | 8             | 1.46716                           | 1.88640       | 8                                 | 0.282643      | 34                                | 0.282628      | 7.2                  | 1.2           | 0.96            | 573  | 7             |
|        | A13  | 0.0267                            | 28            | 0.00091                           | 8             | 1.46717                           | 1.88665       | 9                                 | 0.282422      | 28                                | 0.282416      | -5.9                 | 1.0           | 1.48            | 322  | 5             |
|        | A14  | 0.0167                            | 18            | 0.00059                           | 5             | 1.46725                           | 1.88684       | 7                                 | 0.282469      | 39                                | 0.282466      | -4.2                 | 1.4           | 1.39            | 320  | 5             |
|        | A15  | 0.0470                            | 38            | 0.00153                           | 9             | 1.46729                           | 1.88641       | 9                                 | 0.282575      | 28                                | 0.282559      | 4.8                  | 1.0           | 1.10            | 573  | 7             |
|        | A16  | 0.0281                            | 24            | 0.00102                           | 7             | 1.46714                           | 1.88674       | 9                                 | 0.282465      | 42                                | 0.282459      | -4.3                 | 1.5           | 1.40            | 324  | 4             |
|        | A17  | 0.0515                            | 59            | 0.00173                           | 17            | 1.46720                           | 1.88672       | 10                                | 0.282640      | 47                                | 0.282621      | 7.1                  | 1.7           | 0.98            | 578  | 8             |
|        | A18  | 0.0582                            | 53            | 0.00192                           | 14            | 1.46730                           | 1.88656       | 9                                 | 0.282685      | 54                                | 0.282664      | 8.3                  | 1.9           | 0.90            | 562  | 7             |
|        | A19  | 0.0472                            | 45            | 0.00173                           | 14            | 1.46716                           | 1.88654       | 5                                 | 0.282605      | 49                                | 0.282583      | 7.5                  | 1.7           | 1.02            | 657  | 11            |
|        | A22  | 0.0430                            | 46            | 0.00147                           | 13            | 1.46715                           | 1.88663       | 8                                 | 0.282600      | 42                                | 0.282585      | 5.0                  | 1.5           | 1.06            | 541  | 7             |
|        | A24  | 0.0481                            | 42            | 0.00162                           | 11            | 1.46724                           | 1.88654       | 6                                 | 0.282695      | 35                                | 0.282678      | 8.6                  | 1.3           | 0.87            | 556  | 8             |
|        | A25  | 0.0626                            | 51            | 0.00215                           | 13            | 1.46724                           | 1.88672       | 6                                 | 0.282627      | 39                                | 0.282603      | 6.7                  | 1.4           | 1.01            | 589  | 8             |
|        | A26  | 0.0579                            | 52            | 0.00193                           | 14            | 1.46729                           | 1.88682       | 4                                 | 0.282729      | 57                                | 0.282708      | 9.9                  | 2.0           | 0.81            | 567  | 9             |
|        | A27  | 0.0279                            | 29            | 0.00091                           | 8             | 1.46716                           | 1.88633       | 9                                 | 0.281317      | 55                                | 0.281283      | -10.0                | 2.0           | 3.01            | 1912 | 12            |
|        | A28  | 0.0233                            | 23            | 0.00086                           | 6             | 1.46723                           | 1.88693       | 10                                | 0.282444      | 24                                | 0.282438      | -4.9                 | 0.9           | 1.43            | 330  | 4             |
|        | A29  | 0.0584                            | 49            | 0.00188                           | 12            | 1.46724                           | 1.88657       | 8                                 | 0.282793      | 47                                | 0.282784      | 5.6                  | 1.7           | 0.79            | 252  | 3             |
|        | A30  | 0.0401                            | 45            | 0.00127                           | 12            | 1.46720                           | 1.88648       | 10                                | 0.282293      | 32                                | 0.282279      | -5.1                 | 1.1           | 1.65            | 573  | 8             |
|        | A31  | 0.0401                            | 35            | 0.00121                           | 8             | 1.46733                           | 1.88639       | 8                                 | 0.282337      | 24                                | 0.282325      | -4.3                 | 0.9           | 1.57            | 537  | 7             |
|        | A32  | 0.0595                            | 62            | 0.00181                           | 15            | 1.46718                           | 1.88637       | 8                                 | 0.282852      | 29                                | 0.282843      | 8.0                  | 1.0           | 0.67            | 267  | 3             |
|        | A38  | 0.0857                            | 70            | 0.00251                           | 16            | 1.46725                           | 1.88643       | 7                                 | 0.282854      | 30                                | 0.282842      | 7.7                  | 1.0           | 0.68            | 256  | 3             |
|        | A39  | 0.0703                            | 56            | 0.00213                           | 13            | 1.46733                           | 1.88658       | 7                                 | 0.282866      | 28                                | 0.282856      | 8.2                  | 1.0           | 0.65            | 255  | 3             |
|        | A40  | 0.0154                            | 17            | 0.00059                           | 5             | 1.46721                           | 1.88650       | 5                                 | 0.282733      | 59                                | 0.282726      | 11.6                 | 2.1           | 0.76            | 612  | 8             |
| 107-b  | A417 | 0.0243                            | 21            | 0.00079                           | 5             | 1.46727                           | 1.88646       | 8                                 | 0.282677      | 25                                | 0.282673      | 2.5                  | 0.9           | 0.99            | 292  | 4             |
|        | A418 | 0.0254                            | 21            | 0.00092                           | 6             | 1.46716                           | 1.88670       | 7                                 | 0.282494      | 28                                | 0.282489      | -3.8                 | 1.0           | 1.35            | 300  | 4             |
|        | A419 | 0.0276                            | 43            | 0.00086                           | 12            | 1.46723                           | 1.88672       | 8                                 | 0.282409      | 22                                | 0.282401      | -2.8                 | 0.8           | 1.44            | 485  | 7             |
|        | A425 | 0.0219                            | 23            | 0.00067                           | 6             | 1.46729                           | 1.88640       | 9                                 | 0.282402      | 24                                | 0.282396      | -3.5                 | 0.9           | 1.46            | 461  | 6             |
|        | A426 | 0.0246                            | 20            | 0.00078                           | 5             | 1.46723                           | 1.88696       | 8                                 | 0.282519      | 41                                | 0.282514      | -2.5                 | 1.4           | 1.29            | 319  | 4             |
|        | A427 | 0.0602                            | 53            | 0.00172                           | 12            | 1.46722                           | 1.88639       | 9                                 | 0.282500      | 23                                | 0.282492      | -5.0                 | 0.8           | 1.37            | 240  | 3             |
|        | A429 | 0.0173                            | 19            | 0.00059                           | 5             | 1.46734                           | 1.88659       | 9                                 | 0.282537      | 23                                | 0.282534      | -2.4                 | 0.8           | 1.26            | 290  | 4             |
|        | A431 | 0.0469                            | 55            | 0.00134                           | 13            | 1.46731                           | 1.88630       | 11                                | 0.282532      | 42                                | 0.282528      | -5.4                 | 1.5           | 1.32            | 167  | 3             |
|        | A433 | 0.0126                            | 13            | 0.00036                           | 3             | 1.46726                           | 1.88665       | 10                                | 0.281207      | 44                                | 0.281195      | -17.1                | 1.5           | 3.25            | 1740 | 36            |
|        | A434 | 0.0240                            | 20            | 0.00076                           | 5             | 1.46733                           | 1.88639       | 7                                 | 0.281946      | 28                                | 0.281932      | -8.5                 | 1.0           | 2.16            | 969  | 12            |
|        | A436 | 0.0407                            | 38            | 0.00136                           | 10            | 1.46730                           | 1.88652       | 8                                 | 0.282525      | 26                                | 0.282503      | 9.3                  | 0.9           | 1.09            | 860  | 10            |
|        | A437 | 0.0514                            | 44            | 0.00164                           | 11            | 1.46726                           | 1.88637       | 10                                | 0.282448      | 26                                | 0.282435      | -2.4                 | 0.9           | 1.39            | 448  | 5             |
|        | A438 | 0.0382                            | 124           | 0.00104                           | 25            | 1.46723                           | 1.88688       | 9                                 | 0.282492      | 40                                | 0.282486      | -3.4                 | 1.4           | 1.34            | 323  | 4             |
|        | A444 | 0.0663                            | 118           | 0.00170                           | 24            | 1.46723                           | 1.88668       | 7                                 | 0.282550      | 50                                | 0.282541      | -1.9                 | 1.8           | 1.25            | 303  | 4             |
|        | A445 | 0.0247                            | 24            | 0.00089                           | 7             | 1.46730                           | 1.88668       | 7                                 | 0.280926      | 35                                | 0.280889      | -18.7                | 1.2           | 3.67            | 2142 | 33            |
|        | A451 | 0.0737                            | 64            | 0.00210                           | 14            | 1.46717                           | 1.88690       | 7                                 | 0.282580      | 32                                | 0.282566      | 0.5                  | 1.1           | 1.17            | 370  | 6             |
|        | A453 | 0.0394                            | 40            | 0.00118                           | 9             | 1.46730                           | 1.88637       | 10                                | 0.282456      | 25                                | 0.282449      | -4.8                 | 0.9           | 1.42            | 317  | 4             |
|        | A455 | 0.0643                            | 64            | 0.00198                           | 16            | 1.46723                           | 1.88675       | 10                                | 0.282129      | 35                                | 0.282109      | -11.9                | 1.2           | 1.99            | 540  | 7             |
|        | A456 | 0.0597                            | 49            | 0.00183                           | 12            | 1.46732                           | 1.88648       | 10                                | 0.282364      | 28                                | 0.282350      | -6.3                 | 1.0           | 1.40            | 405  | 7             |
|        | A457 | 0.0202                            | 18            | 0.00064                           | 4             | 1.46727                           | 1.88669       | 11                                | 0.282137      | 29                                | 0.282130      | -10.9                | 1.0           | 1.94            | 550  | 7             |
|        | A458 | 0.0085                            | 8             | 0.00024                           | 2             | 1.46715                           | 1.88666       | 9                                 | 0.282256      | 23                                | 0.282255      | -10.7                | 0.8           | 1.78            | 364  | 6             |
|        | A459 | 0.0386                            | 32            | 0.00140                           | 9             | 1.46715                           | 1.88699       | 9                                 | 0.281998      | 29                                | 0.281983      | -15.4                | 1.0           | 2.21            | 582  | 8             |
|        | A460 | 0.0540                            | 44            | 0.00166                           | 10            | 1.46731                           | 1.88658       | 8                                 | 0.282492      | 24                                | 0.282483      | -4.6                 | 0.9           | 1.37            | 273  | 3             |
|        | A467 | 0.0269                            | 22            | 0.00091                           | 6             | 1.46721                           | 1.88631       | 8                                 | 0.282581      | 21                                | 0.282576      | -0.7                 | 0.7           | 1.18            | 302  | 4             |
|        | A468 | 0.0460                            | 48            | 0.00150                           | 14            | 1.46729                           | 1.88681       | 7                                 | 0.282564      | 36                                | 0.282556      | -1.8                 | 1.3           | 1.22            | 284  | 5             |
|        | A469 | 0.0286                            | 27            | 0.00091                           | 7             | 1.46725                           | 1.88635       | 10                                | 0.282093      | 44                                | 0.282086      | -16.0                | 1.6           | 2.09            | 394  | 5             |
|        | A470 | 0.0128                            | 14            | 0.00056                           | 4             | 1.46718                           | 1.88671       | 10                                | 0.282575      | 29                                | 0.282572      | -0.6                 | 1.0           | 1.18            | 310  | 4             |
|        | A472 | 0.0153                            | 13            | 0.00047                           | 3             | 1.46726                           | 1.88638       | 8                                 | 0.282426      | 28                                | 0.282423      | -6.1                 | 1.0           | 1.47            | 301  | 4             |
|        | A473 | 0.0246                            | 22            | 0.00076                           | 5             | 1.46728                           | 1.88677       | 9                                 | 0.282515      | 22                                | 0.282511      | -2.6                 | 0.8           | 1.30            | 320  | 4             |
|        | A475 | 0.0413                            | 46            | 0.00127                           | 10            | 1.46727                           | 1.88668       | 8                                 | 0.282613      | 50                                | 0.282606      | 0.6                  | 1.8           | 1.12            | 313  | 4             |
|        | A476 | 0.0484                            | 69            | 0.00132                           | 17            | 1.46722                           | 1.88657       | 10                                | 0.282544      | 24                                | 0.282533      | 1.0                  | 0.9           | 1.20            | 447  | 6             |
|        | A477 | 0.0606                            | 67            | 0.00173                           | 15            | 1.46726                           | 1.88642       | 7                                 | 0.282652      | 30                                | 0.282642      | 1.4                  | 1.1           | 1.05            | 289  | 4             |
|        | A478 | 0.0158                            | 14            | 0.00051                           | 4             | 1.46718                           | 1.88672       | 9                                 | 0.282330      | 29                                | 0.282325      | -4.0                 | 1.0           | 1.56            | 552  | 7             |
|        | A479 | 0.0366                            | 42            | 0.00119                           | 11            | 1.46724                           | 1.88670       | 8                                 | 0.282558      | 29                                | 0.282551      | -1.7                 | 1.0           | 1.23            | 295  | 4             |
|        | A481 | 0.0300                            | 24            | 0.00093                           | 6             | 1.46730                           | 1.88642       | 7                                 | 0.280979      | 23                                | 0.280946      | -22.8                | 0.8           | 3.67            | 1876 | 26            |
|        | A482 | 0.0174                            | 21            | 0.00055                           | 5             | 1.46732                           | 1.88649       | 8                                 | 0.282296      | 27                                | 0.282291      | -5.8                 | 1.0           | 1.64            | 523  | 7             |
|        | A483 | 0.0211                            | 25            | 0.00059                           | 6             | 1.46716                           | 1.88661       | 6                                 | 0.282629      | 28                                | 0.282625      | 1.7                  | 1.0           | 1.07            | 329  | 5             |
|        | A484 | 0.0473                            | 38            | 0.00151                           | 9             | 1.46714                           | 1.88653       | 8                                 | 0.282496      | 35                                | 0.282482      | 0.1                  | 1.3           | 1.29            | 486  | 6             |
|        | A485 | 0.0678                            | 67            | 0.00204                           | 16            | 1.46728                           | 1.88657       | 10                                | 0.282467      | 30                                | 0.282450      | -2.4                 | 1.1           | 1.37            | 424  | 5             |
|        | A486 | 0.0251                            | 26            | 0.00077                           | 6             | 1.46715                           | 1.88693       | 9                                 | 0.282564      | 41                                | 0.282560      | -1.8                 | 1.5           | 1.22            | 279  | 4             |
|        | A491 | 0.0649                            | 54            | 0.00203                           | 13            | 1.46718                           | 1.88668       | 8                                 | 0.282471      | 32                                | 0.282453      | -0.9                 | 1.1           | 1.34            | 487  | 6             |
|        | A493 | 0.0352                            | 30            | 0.00114                           | 7             | 1.46722                           | 1.88677       | 7                                 | 0.282391      | 28                                | 0.282378      | -0.5                 | 1.0           | 1.43            | 623  | 8             |
|        | A501 | 0.0410                            | 43            | 0.00138                           | 12            | 1.46727                           | 1.88652       | 7                                 | 0.282540      | 28                                | 0.282532      | -2.0                 | 1.0           | 1.26            | 310  | 4             |
|        | A503 | 0.0480                            | 47            | 0.00137                           | 11            | 1.46727                           | 1.88642       | 7                                 | 0.282225      | 49                                | 0.282213      | -9.4                 | 1.7           | 1.81            | 488  | 6             |
|        | A505 | 0.0606                            | 73            | 0.00174                           | 17            | 1.46720                           | 1.88667       | 7                                 | 0.282635      | 32                                | 0.282625      | 1.0                  | 1.1           | 1.08            | 298  | 4             |
|        | A506 | 0.0381                            | 52            | 0.00124                           | 15            | 1.46718                           | 1.88657       | 11                                | 0.281675      | 67                                | 0.281629      | 3.2                  | 2.4           | 2.32            | 1950 | 33            |
|        | A507 | 0.0202                            | 20            | 0.00076                           | 7             | 1.46721                           | 1.88655       | 9                                 | 0.282606      | 79                                | 0.282602      | 0.3                  | 2.8           | 1.13            | 303  | 4             |
|        | A514 | 0.0323                            | 27            | 0.00098                           | 6             | 1.46728                           | 1.88660       | 10                                | 0.282402      | 43                                | 0.282394      | -3.8                 | 1.5           | 1.47            | 451  | 5             |
|        | A515 | 0.0168                            | 17            | 0.00058                           | 5             | 1.46730                           | 1.88631       | 6                                 | 0.281642      | 55                                | 0.281619      | 6.8                  | 2.0           | 2.26            | 2123 | 18            |
